# Supplementary material for: Why wait? The social determinants underlying tuberculosis diagnostic delay
Source: PubMed Central journal article supplement (PMC5612650; doi:10.1371/journal.pone.0185018), 2017-09-25
Supplement: pone.0185018.s001.pdf [file pone.0185018.s001.pdf]

## PERSON AFFECTED BY TUBERCULOSIS INTERVIEW GUIDE

---

### I. Datos Generales

Fecha de la entrevista (dd/mm/aaa): \_\_\_\_/\_\_\_\_/\_\_\_\_

Hora de inicio de entrevista: \_\_\_\_\_

Lugar de la entrevista: \_\_\_\_\_

Dirección de Salud: \_\_\_\_\_

Red de Salud: \_\_\_\_\_

Establecimiento de salud: \_\_\_\_\_

### II. Características sociodemográficas, vivienda y factores de riesgo

Fecha de Nacimiento (dd/mm/aaa): \_\_\_\_/\_\_\_\_/\_\_\_\_

Lugar de Nacimiento:

Provincia: \_\_\_\_\_

Departamento: \_\_\_\_\_

Distrito: \_\_\_\_\_

Distrito de residencia: \_\_\_\_\_

Tiempo de residencia: 1. Menor a 1 año  2. De 1 a 5 años  3. Mayor a 5 años

Grupo étnico: Mestizo  Blanco/a  Negro/a  Asiático/a

Grado de instrucción:

- |                                  |                                                                                                                                                                                                                                    |
|----------------------------------|------------------------------------------------------------------------------------------------------------------------------------------------------------------------------------------------------------------------------------|
| 1. Sin nivel                     | <input type="checkbox"/>                                                                                                                                                                                                           |
| 2. Primaria completa             | <input type="checkbox"/>                                                                                                                                                                                                           |
| 3. Primaria incompleta           | <input type="checkbox"/> Especificar: 1 <input type="checkbox"/> 2 <input type="checkbox"/> 3 <input type="checkbox"/> 4 <input type="checkbox"/> 5 <input type="checkbox"/> 6 <input type="checkbox"/> 7 <input type="checkbox"/> |
| 4. Secundaria completa           | <input type="checkbox"/>                                                                                                                                                                                                           |
| 5. Secundaria incompleta         | <input type="checkbox"/> Especificar: 1 <input type="checkbox"/> 2 <input type="checkbox"/> 3 <input type="checkbox"/> 4 <input type="checkbox"/> 5 <input type="checkbox"/> 6 <input type="checkbox"/> 7 <input type="checkbox"/> |
| 6. Sup. Técnico completo         | <input type="checkbox"/>                                                                                                                                                                                                           |
| 7. Sup. Técnico incompleto       | <input type="checkbox"/> Especificar: 1 <input type="checkbox"/> 2 <input type="checkbox"/> 3 <input type="checkbox"/> 4 <input type="checkbox"/> 5 <input type="checkbox"/> 6 <input type="checkbox"/> 7 <input type="checkbox"/> |
| 8. Sup. Universitario complete   | <input type="checkbox"/>                                                                                                                                                                                                           |
| 9. Sup. Universitario incompleto | <input type="checkbox"/> Especificar: 1 <input type="checkbox"/> 2 <input type="checkbox"/> 3 <input type="checkbox"/> 4 <input type="checkbox"/> 5 <input type="checkbox"/> 6 <input type="checkbox"/> 7 <input type="checkbox"/> |

¿Cuáles fueron algunos de los estímulos/ inhibiciones para que Ud. acceda a educación superior?

---

---

---

Estado Civil:

- |                  |                          |
|------------------|--------------------------|
| 1. Soltero (a)   | <input type="checkbox"/> |
| 2. Casado(a)     | <input type="checkbox"/> |
| 3. Conviviente   | <input type="checkbox"/> |
| 4. Separado      | <input type="checkbox"/> |
| 5. Divorciado(a) | <input type="checkbox"/> |
| 6. Viudo(a)      | <input type="checkbox"/> |

Numero de hijos: 1  2  3  4  5  6  7

Edad(s): \_\_\_\_\_

Tipo de vivienda:

1. Partícula  1.1.Casa independiente   
1.2.Departamento
2. Colectiva  2.1.Vivienda en quinta   
2.2.Vivienda en casa de vecindad
3. Sin Vivienda

Tenencia de la vivienda:

1. Propia
2. Alquilada
3. Vivienda familiar  Especificar: \_\_\_\_\_
4. Alojado
5. En la calle

### Características de la vivienda.

Puedes describir su casa? Por ejemplo, el material que hacen la casa, la disponibilidad de agua en la casa, y el tamaño de la casa.

1. Material predominante en las paredes: \_\_\_\_\_
2. Material predominante en los pisos: \_\_\_\_\_
3. Material predominante en los techos: \_\_\_\_\_
4. Abastecimiento de agua: \_\_\_\_\_

Número de habitaciones: 1 2 3 4 5 Número de dormitorios: 1 2 3 4 5

Ud. Comparte su dormitorio con algún otro miembro de la familia? Sí  No

### Hábitos Nocivos.

Ud. ¿Ha fumado cigarrillos? Sí  No  Actualmente

Numero de cigarrillos al día: \_\_\_\_\_

¿Por cuantos años? \_\_\_\_\_

Ud. ¿Ha consumido alcohol? Sí  No

¿Cuantas veces por semana? 1 2 3 4 5 6 7

¿Cuantas copas? 1 2 3 4 5 6 7 8 9 10

Ud. ¿ha consumido drogas?

Sí  No  Actualmente  ¿Por cuantos años? \_\_\_\_\_

Pasado  ¿Por cuantos años? \_\_\_\_\_

¿Qué tipo? \_\_\_\_\_

### III. Composición familiar

Número de miembros de la familia con los que vive: \_\_\_\_\_

| Nº | EDAD | SEXO | PARENTESCO | TRABAJA |    | ACTIVIDAD<br>(Descripción de Trabajo) | Grado de INSTRUCCIÓN | APOORTE ECONÓMICO |    | CANTIDAD QUE APORTA | ¿Tiene Tuberculosis? |    |
|----|------|------|------------|---------|----|---------------------------------------|----------------------|-------------------|----|---------------------|----------------------|----|
|    |      |      |            | SI      | NO |                                       |                      | SI                | NO |                     | SI                   | NO |
| 1  |      |      |            |         |    |                                       |                      |                   |    |                     |                      |    |
| 2  |      |      |            |         |    |                                       |                      |                   |    |                     |                      |    |
| 3  |      |      |            |         |    |                                       |                      |                   |    |                     |                      |    |
| 4  |      |      |            |         |    |                                       |                      |                   |    |                     |                      |    |
| 5  |      |      |            |         |    |                                       |                      |                   |    |                     |                      |    |
| 6  |      |      |            |         |    |                                       |                      |                   |    |                     |                      |    |
| 7  |      |      |            |         |    |                                       |                      |                   |    |                     |                      |    |
| 8  |      |      |            |         |    |                                       |                      |                   |    |                     |                      |    |
| 9  |      |      |            |         |    |                                       |                      |                   |    |                     |                      |    |

### IV. Características Socioeconómicas

¿Ud. se encuentra trabajando actualmente? Si  2. No

\*Si está definido por más de 8 horas cada día.

De ser afirmativa señale el trabajo que realiza: (Titulo y descripción)

\_\_\_\_\_

¿Cuáles son sus horas de trabajo normal?

\_\_\_\_\_

¿Cómo es su entorno de trabajo?

Luz artificial

Luz natural

Lleno de gente

Tiene ventanas

No tiene ventanas

Excesivamente húmedo

Ruidoso

Oscuro

Descripción:

\_\_\_\_\_

¿Cómo ha cambiado su trabajo con la enfermedad?

\_\_\_\_\_

\_\_\_\_\_

## Nivel de Ingresos

| Descripción | Ingresos (S/. nuevos soles)        | Descripción                      | Egresos (S/. nuevos soles)       |
|-------------|------------------------------------|----------------------------------|----------------------------------|
| Mensual     | <750 <input type="checkbox"/>      | Alimentos                        | < 200 <input type="checkbox"/>   |
|             | 750-1000 <input type="checkbox"/>  |                                  | 200-400 <input type="checkbox"/> |
|             | 1000-1500 <input type="checkbox"/> |                                  | >400 <input type="checkbox"/>    |
|             | >1500 <input type="checkbox"/>     |                                  |                                  |
| Adicional   |                                    | Vivienda                         | < 200 <input type="checkbox"/>   |
|             |                                    |                                  | 200-400 <input type="checkbox"/> |
|             |                                    |                                  | >400 <input type="checkbox"/>    |
| Otros       |                                    | Educación                        | < 200 <input type="checkbox"/>   |
|             |                                    |                                  | 200-400 <input type="checkbox"/> |
|             |                                    |                                  | >400 <input type="checkbox"/>    |
|             |                                    | Vestimenta                       | < 200 <input type="checkbox"/>   |
|             |                                    |                                  | 200-400 <input type="checkbox"/> |
|             |                                    |                                  | >400 <input type="checkbox"/>    |
|             |                                    | Salud                            | < 200 <input type="checkbox"/>   |
|             |                                    |                                  | 200-400 <input type="checkbox"/> |
|             |                                    |                                  | >400 <input type="checkbox"/>    |
|             |                                    | Recreación                       | < 200 <input type="checkbox"/>   |
|             |                                    |                                  | 200-400 <input type="checkbox"/> |
|             |                                    |                                  | >400 <input type="checkbox"/>    |
|             | Deudas                             | < 200 <input type="checkbox"/>   |                                  |
|             |                                    | 200-400 <input type="checkbox"/> |                                  |
|             |                                    | >400 <input type="checkbox"/>    |                                  |
|             | Otros                              |                                  |                                  |

### Total

## V. Estado de Salud: Enfermedad actual, comorbilidades y cuidados de salud

¿Dónde cree Ud. que ha estado expuesto a la tuberculosis?

---

¿Ha estado Ud. rodeado por personas con tuberculosis?

---

¿Siempre ha vivido aquí? (localidad donde se le entrevista)

\*Si la respuesta es no, saltar la pregunta.

---

¿Su familia siempre ha vivido aquí? (localidad donde se le entrevista)

---

¿Por qué se mudó aquí?

---

---

---

¿Son distintas las condiciones de vida aquí que en donde vivía anteriormente?

---

---

---

¿Cree Ud. que es más fácil contraer tuberculosis aquí que en donde vivía anteriormente?

---

---

---

**Hábitos alimenticios.** ¿Cuántas comidas al día come? \_\_\_\_\_

¿Qué come, donde y por qué?

Desayuno: \_\_\_\_\_

Almuerzo: \_\_\_\_\_

Cena: \_\_\_\_\_

Otro: \_\_\_\_\_

### Síntomas de la tuberculosis

|                     | NA                       | Tiempo Antes de Diagnostico | Descripción |
|---------------------|--------------------------|-----------------------------|-------------|
| 1. Tos con Flema:   | <input type="checkbox"/> | _____                       | _____       |
| 2. Fiebre:          | <input type="checkbox"/> | _____                       | _____       |
| 3. Pérdida de peso: | <input type="checkbox"/> | _____                       | _____       |
| 4. Hemoptisis:      | <input type="checkbox"/> | _____                       | _____       |
| 5. Otros:           | <input type="checkbox"/> | _____                       | _____       |

Ud. ha recibido un diagnóstico de:

1. Diabetes  Año de Diagnóstico: \_\_\_\_\_

2. EPOC  Año de Diagnóstico: \_\_\_\_\_

3. VIH/SIDA  Año de Diagnóstico: \_\_\_\_\_

4. Discapacidad  Año de Diagnóstico: \_\_\_\_\_

5. Otros: \_\_\_\_\_

### Comportamiento de búsqueda de atención en salud

¿Cuándo empezó a sentirse mal?

---

---

---

¿Qué es lo primero que pensó? ¿Por qué?

---

---

---

¿Qué síntomas hicieron que Ud. busque atención para su salud? ¿Por qué?

---

---

¿A dónde acudió Ud. primero para atender su problema de salud?

- 1. Farmacia
- 2. Automedicación
- 3. Medicina Tradicional
- 4. Médico particular
- 5. Profesional de salud
- 6. Otros: \_\_\_\_\_

¿Cuáles fueron los motivos por los cuales tomó esa decisión?

---

---

¿Cuáles fueron las medicinas que tomó?

---

---

¿En qué fecha Ud. acudió a la visita a un médico por la enfermedad actual? (dd/mm/aaaa)  
\_\_\_\_/\_\_\_\_/\_\_\_\_

¿Cómo se llamaba el establecimiento de salud donde acudió por primera vez?

---

---

¿Por qué Ud. decidió venir a este establecimiento de salud?

- 1. Fácil acceso
- 2. Confianza en curarse
- 3. Atención disponible en cualquier momento
- 4. Referido por un personal de salud anterior
- 5. Atención gratuita
- 6. Aconsejado por otra persona
- 7. Otro: \_\_\_\_\_

Describa:

---

---

¿Cómo fue esta primera experiencia?

---

---

¿Cómo fueron los recursos disponibles en el centro de salud? (Por ejemplo, información sobre TB, equipos de diagnóstico) Describa.

---

---

¿El tratamiento que recibió del personal de salud? Describa.

---

---

---

---

¿Cómo fue el tiempo que tuvo que esperar para que sea atendido? Describa.

\_\_\_\_\_

\_\_\_\_\_

Cuando usted empezó a sentirse enfermo, ¿cuáles fueron las razones por las que Ud. espero para ir a un centro de salud?

1. Demasiado lejos
2. Demasiado ocupado
3. Largo tiempo de espera
4. Mala experiencia
5. Miedo al diagnóstico
6. Negación/ocultamiento de síntomas
7. Miedo al aislamiento social
8. Restricciones económicas
9. Mala actitud del personal del centro de salud
10. Pobre calidad del servicio de salud
11. Otros: \_\_\_\_\_

¿En qué fecha Ud. fue diagnosticado de TB? (dd/mm/aaa): \_\_\_\_/\_\_\_\_/\_\_\_\_

¿Estaba sorprendido a recibió este diagnosticado?

\_\_\_\_\_

\_\_\_\_\_

¿Cuántas veces Ud. busco atención médica antes de ser diagnosticado de TB?

\_\_\_\_\_

\_\_\_\_\_

¿A qué distancia queda el establecimiento de salud de su domicilio? (especifique tiempo)

## **VI. Respuesta social a la enfermedad**

¿Ud. se ha sentido avergonzado por tener tuberculosis?

\_\_\_\_\_

\_\_\_\_\_

¿Ud. tiene que ocultar su diagnóstico de tuberculosis a otras personas?

\_\_\_\_\_

\_\_\_\_\_

¿Ud. piensa que la tuberculosis afecta alguna de sus relaciones sociales? (incluyendo marital y familiar)?

\_\_\_\_\_

\_\_\_\_\_

¿Es costoso para Ud. el tratamiento de la tuberculosis? ¿Por qué?

\_\_\_\_\_

\_\_\_\_\_

¿La tuberculosis afecta su trabajo?

\_\_\_\_\_

\_\_\_\_\_

¿La tuberculosis afecta sus responsabilidades familiares?

\_\_\_\_\_

\_\_\_\_\_

¿Piensa Ud. que hay menos posibilidades de casarse debido al diagnóstico de tuberculosis?

¿Cree Ud. que es más difícil para las mujeres que los hombres a recibir tratamiento contra la tuberculosis?

---

---

¿Existe discriminación de las personas con tuberculosis? ¿Dónde?

---

---

¿Según tu apreciación que ayudaría a las personas a acudir más rápido después de tener los primeros síntomas de la tuberculosis al médico?

---

---

## VII. Conocimientos de la enfermedad

¿Piensa Ud. que la tuberculosis es una causa de infertilidad en la mujer?

---

---

¿La TB afecta la lactancia materna?

---

---

¿La TB afecta el resultado del embarazo?

---

---

¿Ha oído anteriormente hablar sobre TB? Si  No

¿Antes de su diagnóstico, que has escuchado sobre TB y el tratamiento de TB?

El tratamiento es gratis

El tratamiento es caro

El tratamiento es largo

A veces las clínicas no tienen las pastillas

El tratamiento es doloroso

Personas con TB recibe malo tratamiento en las clínicas

Personas con TB recibe bien tratamiento en las clínicas

Otro: \_\_\_\_\_

---

---

¿Dónde obtuvo esa información?

1.Campaña de salud

2.Instituciones educativas

3.Amigos o familiares

4.Amigos o familiares con la enfermedad

5.Otro: \_\_\_\_\_

---

---

¿La tuberculosis es hereditaria?

---

---

¿Es contagiosa la tuberculosis?

---

---

¿Cómo se contrae la tuberculosis?

---

---



¿Cuál es la causa de tuberculosis?

---

---

¿Se puede curar la tuberculosis?

---

---

¿Existe una vacuna contra la tuberculosis?

---

---

¿Sabe cuánto tiempo durará su tratamiento?

---

---

## **FAMILY MEMBER INTERVIEW GUIDE**

---

### **Datos Generales**

Fecha de la entrevista (dd/mm/aaa): \_\_\_\_/\_\_\_\_/\_\_\_\_

Lugar de la entrevista: \_\_\_\_\_

Dirección de Salud: \_\_\_\_\_

Red de Salud: \_\_\_\_\_

Establecimiento de salud: \_\_\_\_\_

Edad: \_\_\_\_\_

Genero: \_\_\_\_\_

Relación a persona con TB: \_\_\_\_\_

1. ¿Que opiniones sobre la tuberculosis tienen las personas en su comunidad?
2. ¿Sí una persona tiene TB, como lo tratan los demás y que dicen sobre él?
3. ¿Cuáles son las causas que originan la tuberculosis?
4. ¿Quien tiene mayor riesgo de contraer tuberculosis?
5. ¿Cuándo una persona tiene tos con flema, fiebre o pérdida de peso que hace primero? ¿Tos con sangre?
6. ¿Es frecuente que las personas se automediquen y por qué?
7. Porque las personas esperan antes de ir al médico?
8. ¿Qué saben las personas sobre el tratamiento por TB?
9. ¿Si una persona tiene síntomas de tuberculosis, ¿qué ayudaría a la persona a acudir más rápido al médico?

## FOCUS GROUP GUIDE

---

Fecha de Grupo Focal (dd/mm/aaa): \_\_\_\_/\_\_\_\_/\_\_\_\_

Lugar de la entrevista: \_\_\_\_\_

Dirección de Salud: \_\_\_\_\_

Red de Salud: \_\_\_\_\_

Establecimiento de salud: \_\_\_\_\_

Facilitador: \_\_\_\_\_

Anotador: \_\_\_\_\_

1. ¿Qué contribuye a la alta prevalencia de tuberculosis en esta comunidad?
2. ¿Quién tiene mayor riesgo a contraer tuberculosis?
3. ¿Cuáles son las percepciones de tuberculosis en esta comunidad de las personas que no tiene la enfermedad que ustedes hayan escuchado?
4. ¿Antes de ir al médico, que hacen generalmente las personas cuando tienen síntomas de tuberculosis?
5. ¿Que tipos de medicinas toman las personas antes de ir al médico? ¿Cuales son algunas razones para este comportamiento?
6. ¿Normalmente, ¿cuantos días esperan personas antes de ir al médico?
7. ¿Cuáles son algunas razones por las cuales las personas esperan antes de ir al médico?
8. ¿Normalmente, que conocen las personas sobre tuberculosis cuando ustedes los atienden por primera vez?
9. ¿Cuando las personas escuchan sobre sus diagnostica, ¿cómo reaccionan generalmente?
10. ¿Qué conocen las personas generalmente sobre el tratamiento de TB cuando conversan con ellos por primera vez?
11. ¿Como ayudan a las personas a aprender sobre su enfermedad, manejar y terminar su tratamiento?
12. ¿Cuanto tiempo esta con las afectadas por tuberculosis?
13. ¿Ustedes consideran que hay discriminación contra las personas con tuberculosis?  
¿Quienes discrimina? ¿Cuáles una forma de discriminación que ustedes han observado y donde han observado estas?
14. ¿Cuáles son las consecuencias sociales por tener tuberculosis?
15. ¿Cuales son algunas de las actitudes que generalmente tiene el personal de salud que trabaja con personas con tuberculosis?
16. ¿Qué ayudaría a las personas a ir al médico más rápido cuando tienen síntomas de tuberculosis?
